# Supplementary material
Source: PubMed Central journal article supplement (PMC2964991)
Supplement: JCI43670sd.pdf [file JCI43670sd.pdf]

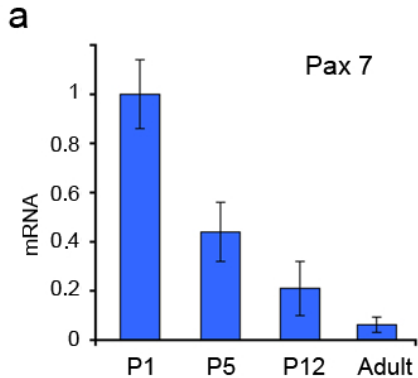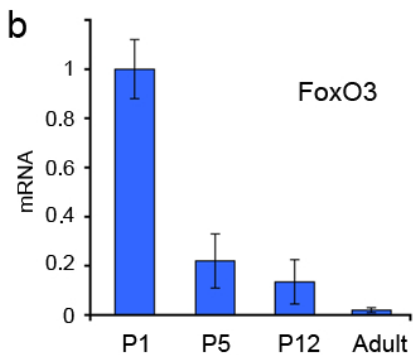

Fig. S1

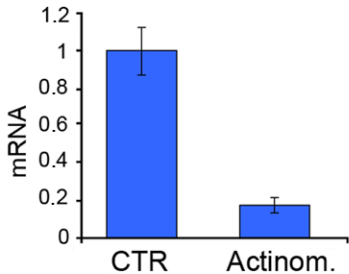

Fig. S2

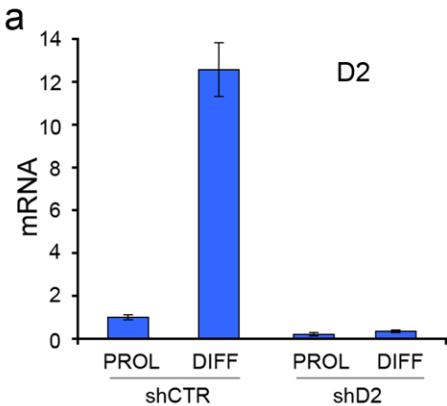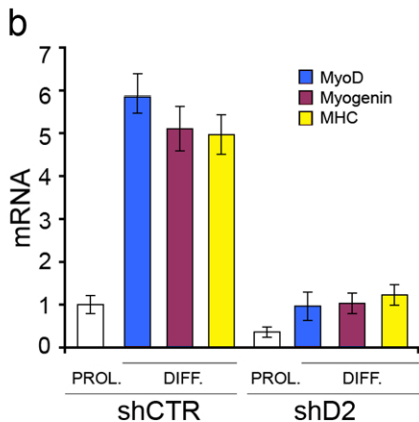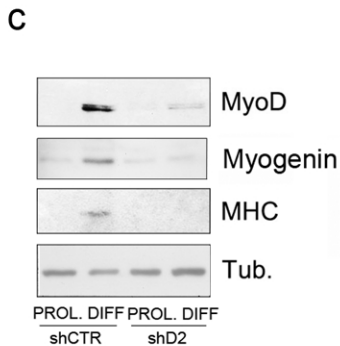

Fig. S3

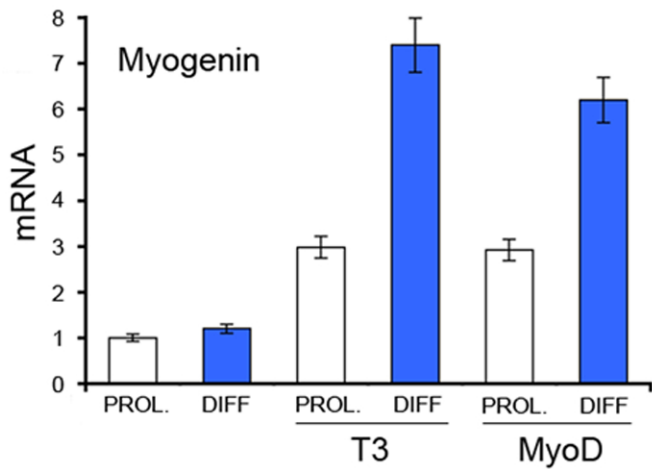

Fig. S4

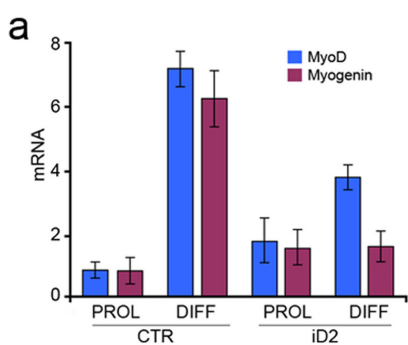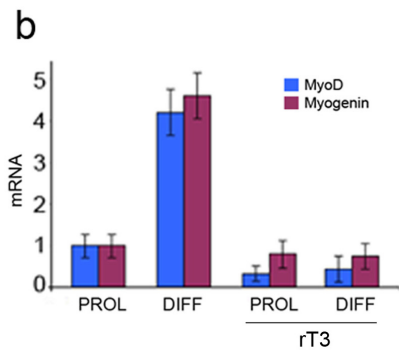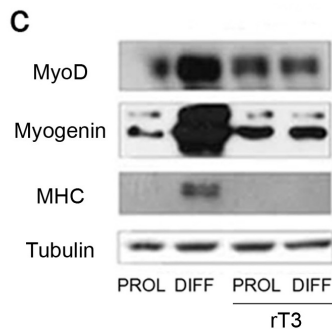

Fig. S5

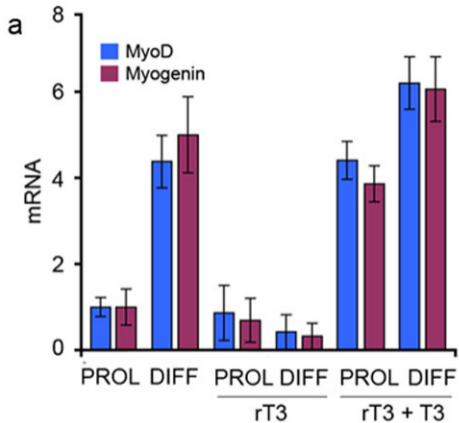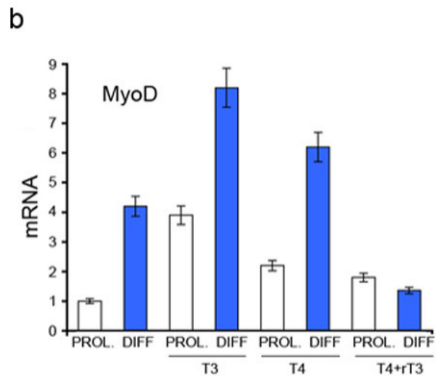

Fig. S6

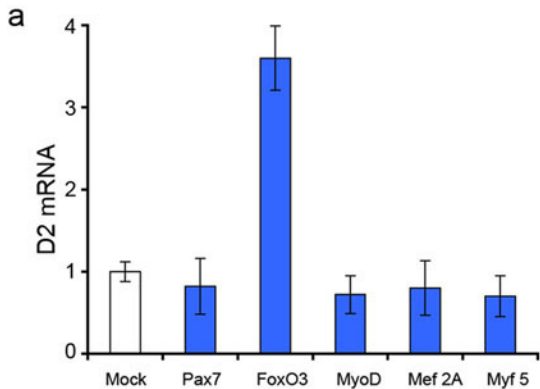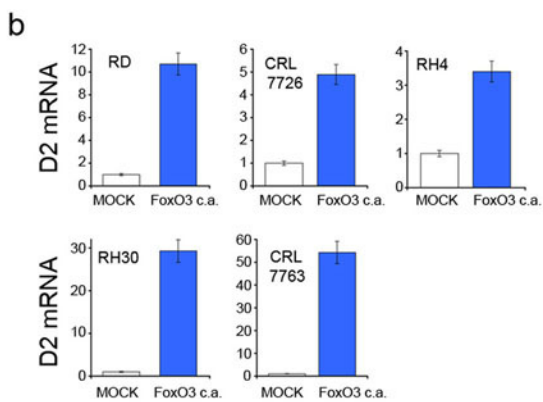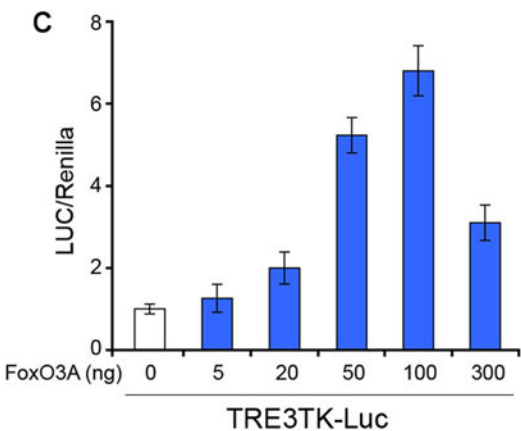

Fig. S7

**a**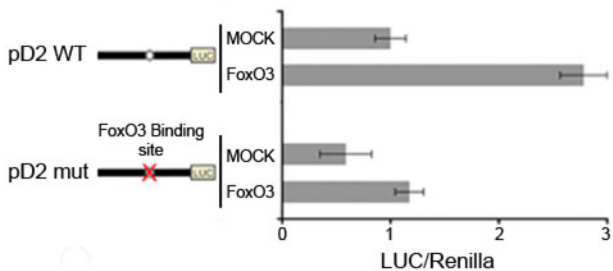**b**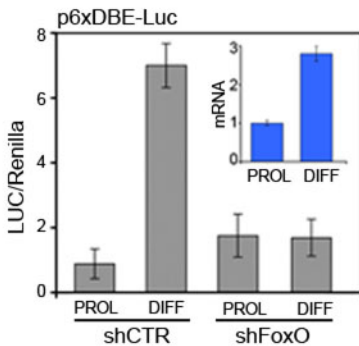

Fig. S8



**a**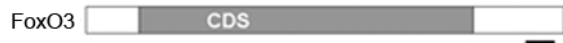**b**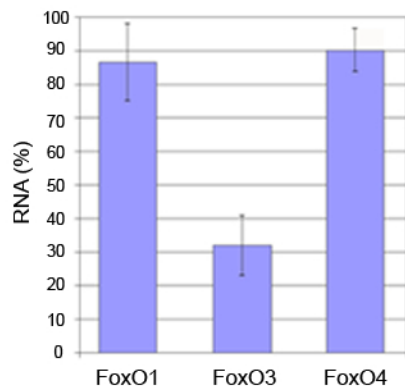**c**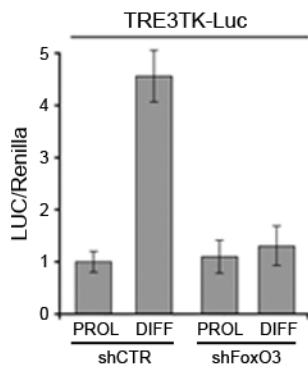**Fig. S9**

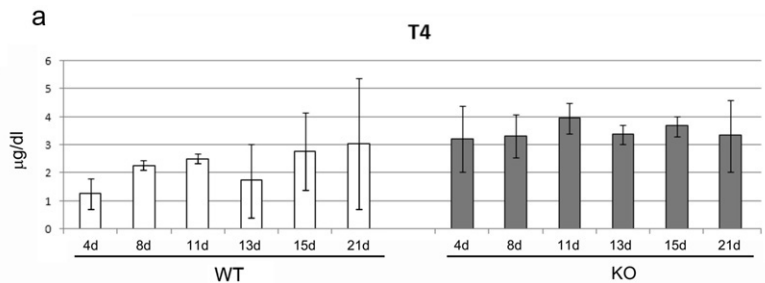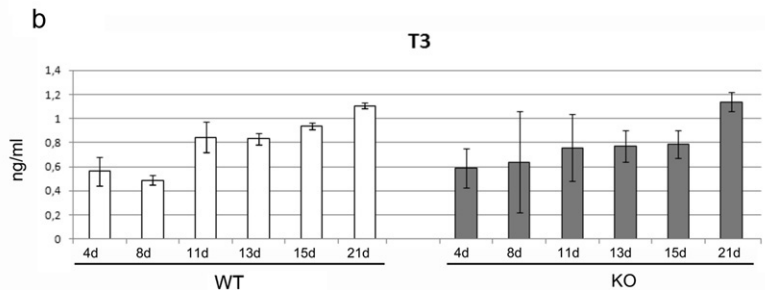

Fig. S10

DAPI

BrdU

Merge

WT D15

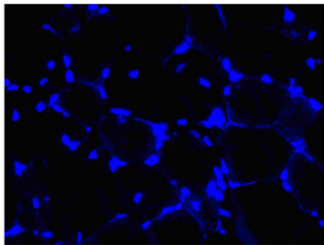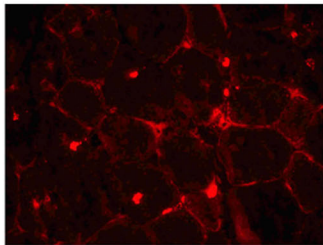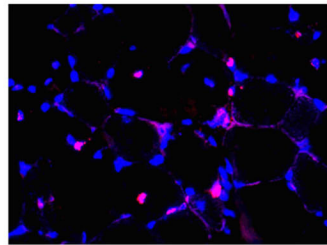

KO D15

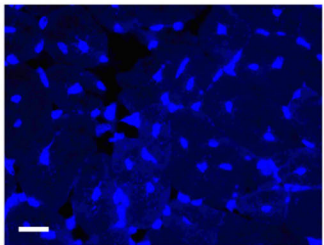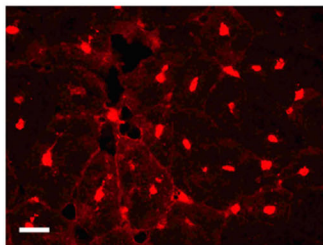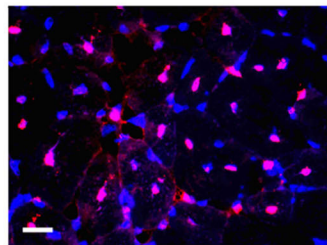

Fig. S11

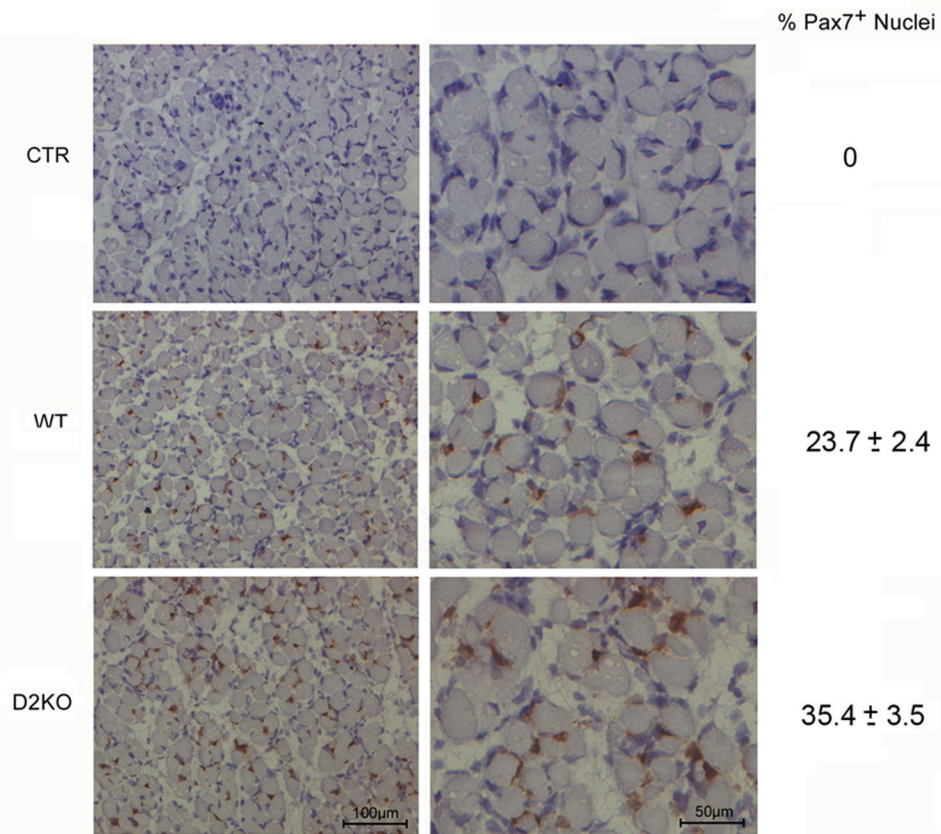

Fig. S12

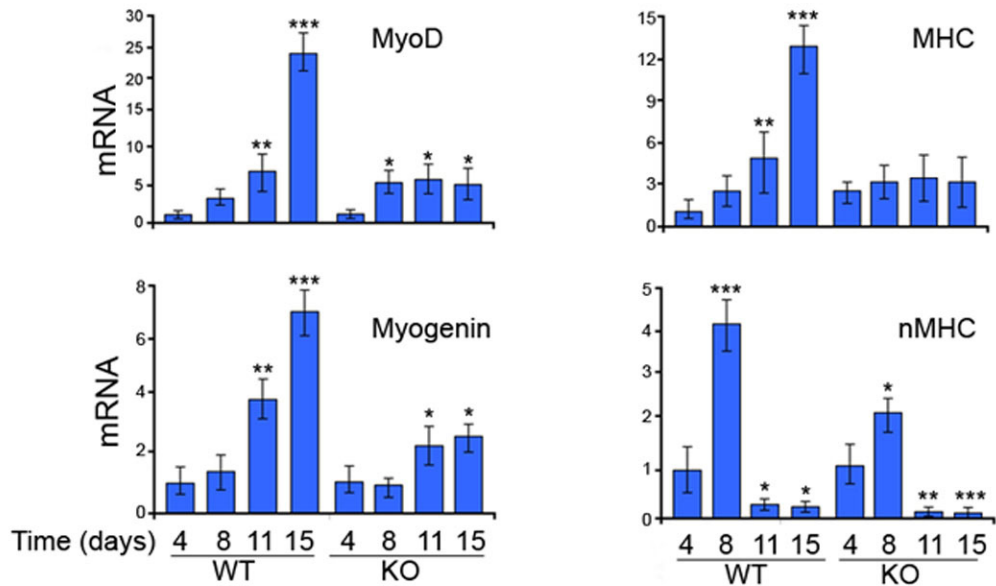

Fig. S13

Table I.

| <b>Primers used for RT-PCR analysis</b>           |                                                                |                                         |
|---------------------------------------------------|----------------------------------------------------------------|-----------------------------------------|
| <b>Gene</b>                                       | <b>Forward primer (5' - 3')</b>                                | <b>Reverse primer (5' - 3')</b>         |
| <i>Cyclophilin A</i>                              | CGCCACTGTCGCTTTTCG                                             | AACTTTGTCTGCAAACAGCTC                   |
| <i>dio2</i>                                       | CTTCCTCCTAGATGCCTACAAAC                                        | GGCATAATTGTTACCTGATTCAGG                |
| <i>dio3</i>                                       | CCGCTCTCTGCTGCTTCAC                                            | CGGATGCACAAGAAATCTAAAAGC                |
| <i>FoxO3</i>                                      | TTGTCCTCAGATCTACGAGTGGA                                        | CGTGCCTTCATTCTGAACGCGCA                 |
| <i>MHC2</i>                                       | CCATTCAGAGCAAAGATGCAGG                                         | GCATAACGCTCTTTGAGGTTG                   |
| <i>myoD</i>                                       | GACCTGCGCTTTTTTGAGGACC                                         | CAGGCCACAGCAAGCAGCGAC                   |
| <i>myogenin</i>                                   | TTGCTCAGCTCCCTCAACCAGGA                                        | TGCAGATTGTGGGCGTCTGTAGG                 |
| <i>dio2</i> 5' flanking                           | CGCTCCTGGAGAACCTGGAGAA                                         | AAGACCAGGTTACAGGCTCTGCA                 |
| <i>Neonatal MHC</i>                               | CACCTTCGCTGTAAATTTGTC                                          | GAACCTGAAGGAGAGGTCGA                    |
| <i>pax7</i>                                       | ACCCTGATGCATGGTTGATGG                                          | GTCTGGTTTCAGTAACCGGCGTG                 |
| <b>Primers used for cloning and EMSA</b>          |                                                                |                                         |
| <i>dio2</i> 5' flanking                           | GCCGGAGCTCTATTCCCTCTGATAAGATCA<br>TTAC                         | GCCGCTCGAGCTTCTCTGCCTCCTCGGTCA<br>GT    |
| <i>dio2</i> FoxO binding site WT                  | GAAAGTATGTTTACAACGGAGTAAAGACAG<br>AGCG                         | CGCTCTGTCTTTACTCCGTTGTAAACATAC<br>TTTC  |
| <i>dio2</i> FoxO binding site mutant              | GAAAGTATGCCACAACGGAGTCCCGACAG<br>AGCG                          | CGCTCTGTCTGGGACTCCGTTGTGGGCATAC<br>TTTC |
| <b>Primers used for shRNA plasmids generation</b> |                                                                |                                         |
| CTR forward                                       | AATTC AAGCAGCAGAAGTACCTGTCGCAAGAGACGACAGGTA                    | CTTCTGCTGCTTTTTTTTC                     |
| CTR reverse                                       | TCGAGAAAAAAGCAGCAGAAGTACCTGTCGTCTCTTGCAGAGGTA                  | CTTCTGCTGCTTG                           |
| <i>dio2</i> forward                               | AATTCGCATGGACAATAATGCCAACGCAAGAGACGTTGGCATTATTGTCCATGCTTTTTTC  |                                         |
| <i>dio2</i> reverse                               | TCGAGAAAAAGCATGGACAATAATGCCAACGTCCTCTTGGGTTGGCATTATTGTCCATGCG  |                                         |
| <i>FoxO3</i> forward                              | AATTCGTCCTTTCCCTAGCACACTTACAAGAGATAAGTGTGCTAGGGAAAGGACTTTTTTC  |                                         |
| <i>FoxO3</i> reverse                              | TCGAGAAAAAGTCCCTTTCCCTAGCACACTTATCTCTTGTAAAGTGTGCTAGGGAAAGGACG |                                         |

## Supplemental data

### Fig. S1.

**(a-b)** Anterior tibialis muscles from mice at 1, 5, 12 and 21 postnatal days (P1 to adult) were homogenized and cDNAs were prepared for real time PCR analysis of Pax7 and FoxO3 expression. CyclophilinA was used as internal control. Normalized copies of the target gene in tibialis muscle at P1 were set as 1. Data are shown as average of 3 separate assays analyzing 4 mice for each group,  $\pm$  standard deviation.

### Fig. S2.

C2C12 cells, cultured in proliferative or differentiating medium for 48h, were treated with Actinomycin D for 12 hours, and cDNAs were prepared to perform real time PCR using specific D2 and cyclophilinA (as internal control) oligonucleotides. Normalized copies of D2 gene in differentiated cells without Actinomycin treatment were set as 1. Error bars represent s.d.

### Fig. S3.

**(a)** C2C12 cells were transfected with shRNA plasmid specific for D2 knockdown (shD2) or scrambled control oligonucleotides (shCTR) and cultured in proliferating or differentiative conditions. Total RNA was extracted to measure D2 mRNA levels by real time PCR. CyclophilinA mRNA was measured as internal control. Normalized copies of D2 in proliferating cells transfected with shCTR were set as 1. **(b)** MyoD, myogenin and MHC mRNA levels were measured by real time PCR from shD2 and shCTR cells, cultured in proliferating or differentiative medium. **(c)** Western blot analysis of myoD, myogenin, MHC and tubulin of total lysates from shD2 and shCTR cells. Error bars represent s.d.

### Fig. S4.

C2C12 cells were cultured in thyroid hormone deprived medium and treated with 30 nM T3 or transfected with myoD expression plasmid as indicated. Myogenin mRNA was measured by real time PCR as marker of differentiation. Error bars represent s.d.

**Fig. S5.**

**(a)** C2C12 cells were transiently transfected with RNAi oligonucleotides specific for D2 knockdown (iD2) or scramble control oligonucleotides (CTR) and cultured in proliferating or differentiative conditions. Total RNA was extracted to measure myoD and myogenin mRNA levels by real time PCR. CyclophilinA mRNA was measured as internal control. Normalized copies of each gene in proliferating cells transfected with CTR were set as 1. **(b)** cDNAs were prepared from C2C12 cells cultured in the presence of rT3 or vehicle. cDNAs were analyzed for MyoD, myogenin and cyclophilinA expression by RT-PCR. For each gene, normalized copies of the target gene in proliferating cells were set as 1. **(c)** Western blot analysis of total lysates from C2C12 cells cultured as in b. Tubulin was used as loading control.

**Fig. S6.**

**(a)** C2C12 cells, cultured in proliferating or differentiating medium, were treated for 48h with vehicle, rT3 or rT3 plus T3. MyoD and myogenin mRNA levels were measured by real time PCR. **(b)** MyoD mRNA levels in C2C12 cells grown in proliferative or differentiating medium and treated with T3, T4 or T4 plus rT3 for 48 hours.

**Fig. S7.**

**(a)** C2C12 cells were transiently transfected with the indicated transcription factors and total mRNAs were analyzed for D2 expression by real time PCR. Normalized copies of D2 gene in Mock transfected cells were arbitrarily set as 1. **(b)** D2 mRNA was measured in different rhabdomyosarcoma cell lines transfected with FoxO3 or an empty vector. Normalized copies of the *Dio2* gene in Mock-transfected cells were set as 1. **(c)** C2C12 cells were transiently co-transfected with TRE3TK-Luc plasmid, different amount of FoxO3 expressing vector and CMV-Renilla plasmid as internal control. The LUC/Renilla value from mock-transfected plasmid was arbitrarily set as 1. Error bars represent s.d.



**Fig. S8.**

(a) C2C12 cells were co-transfected with a 1.4kb mouse *Dio2* promoter (pD2 WT) or its mutant in the putative FoxO3 binding site (pD2mut) and CMV-Flag (Mock) or FoxO3 plasmids. (b) C2C12 cells were stably transfected with a control (shCTR) or a FoxO3 shRNA (shFoxO3) constructs. FoxO3 activity was analyzed by measuring the activity of the FoxO3 responding promoter (p6xDBE-Luc). Inside panel: endogenous FoxO3 mRNA level was measured in proliferating and differentiated C2C12 cells.

**Fig. S9.**

(a) C2C12 cells were transfected with shRNA plasmid specific for FoxO3 knockdown (shFoxO3) targeting the indicated region within the FoxO3 3'UTR. (b) Specificity of shFoxO3 silencing was analyzed by measuring mRNA levels of FoxO1, FoxO3 and FoxO4 in shFoxO3 cells versus shCTR cells. CyclophilinA mRNA was measured as internal control. (c) shCTR or shFoxO3 cells were transiently transfected with a T3-responsive (TRE3TKLUC) and CMV-Renilla plasmids, and differentiation was induced for 48h.

**Fig. S10.**

(a-b) Serum thyroid hormone levels during mouse muscle regeneration experiment from wild type (wt) and D2 null mice (KO). Each time point represents the mean from three different animals.

**Fig. S11.**

Immunofluorescent staining for BrDU, DAPI or merged images in sections from tibialis anterior muscle from D2KO and WT mice at 15 days following CTX injection. Scale bar = 50  $\mu$ m.

**Fig. S12.**

Immunohistochemical analysis for Pax7 positive cells in sections from tibialis anterior muscle from D2KO and WT mice (post-natal day 4). The percentage of Pax7 positive cells / total cells is indicated. CTR indicates the absence of primary antibody.

**Fig. S13.**

MyoD, MHC, Myogenin, and neonatal MHC mRNAs were measured by real time PCR from WT and D2KO mice at the indicated times following cardiotoxin injection. For each gene, normalized copies of the target gene in WT tissue at 4 days after CTX injection were set as 1. Error bars represent s.d. \* P<0.05, \*\*P<0.01, \*\*\*P<0.001 compared with D2 activity at 2 days following injection, n=5.

### **Table I**

Primers used in the study
